# Supplementary material for: Persistent homology analysis of brain transcriptome data in autism
Source: PubMed Central journal article supplement (PMC6769309; doi:10.1098/rsif.2019.0531), 2019-09-25

**A. Microarray ASD**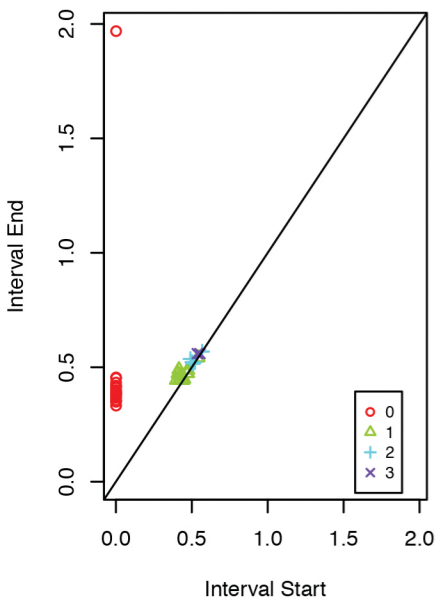**B. Microarray Controls**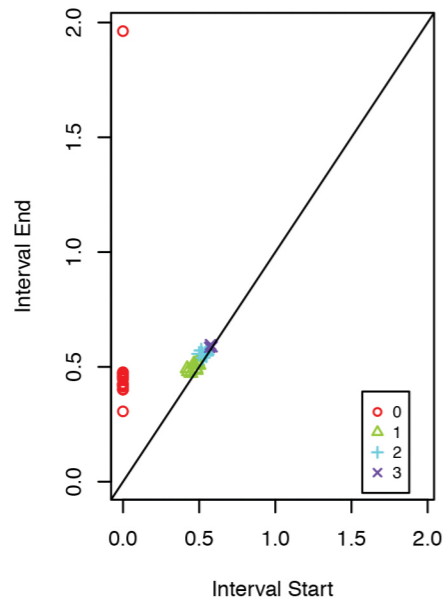**B. Microarray ASD**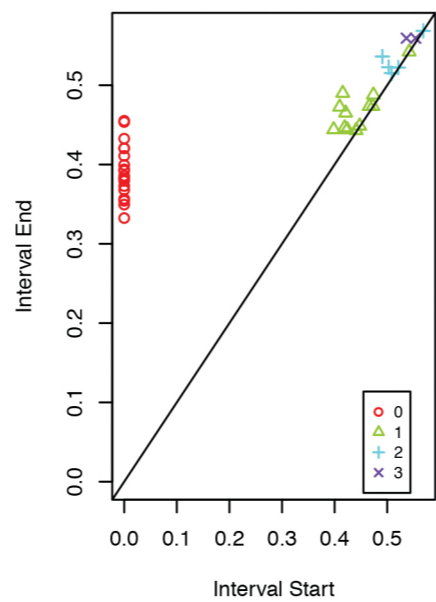**B. Microarray Controls**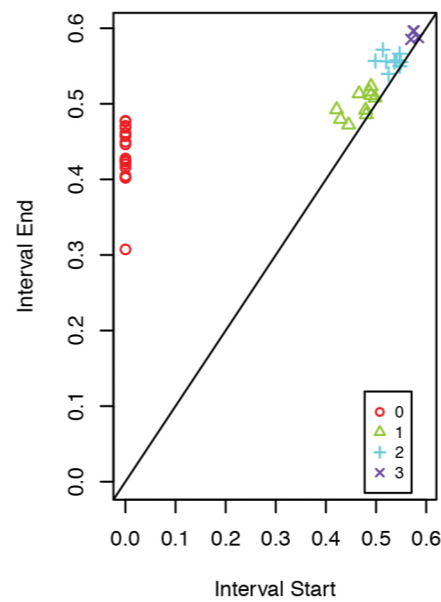**C. SDT**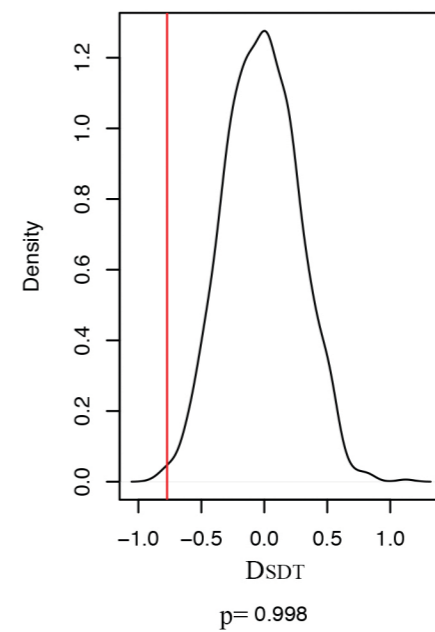**C. Euler Characteristic**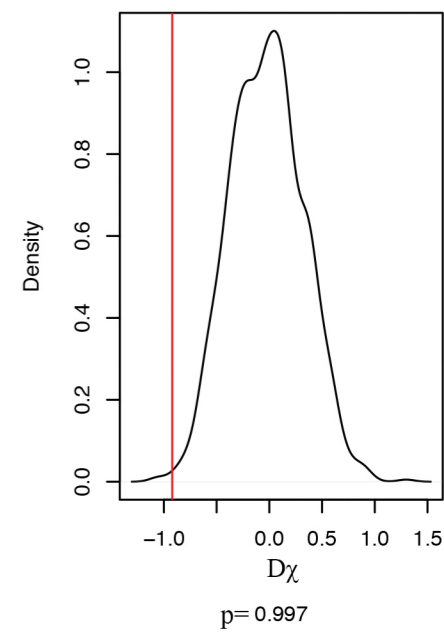**D. RNA-seq ASD**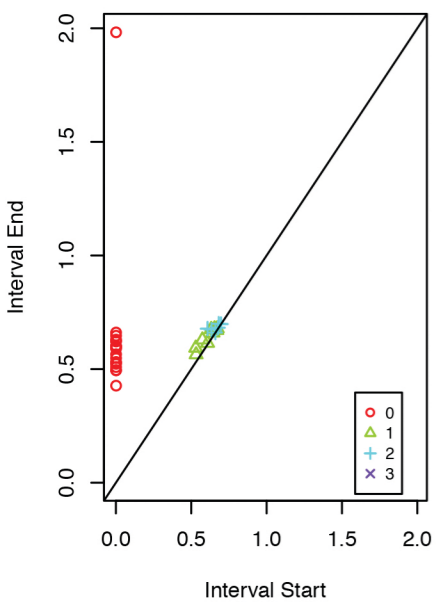**D. RNA-seq Controls**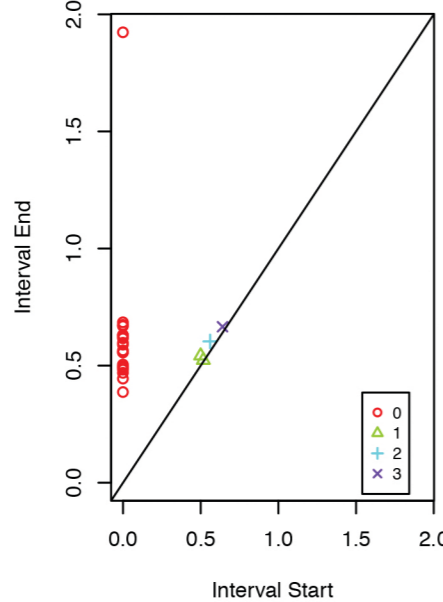**E. RNA-seq ASD**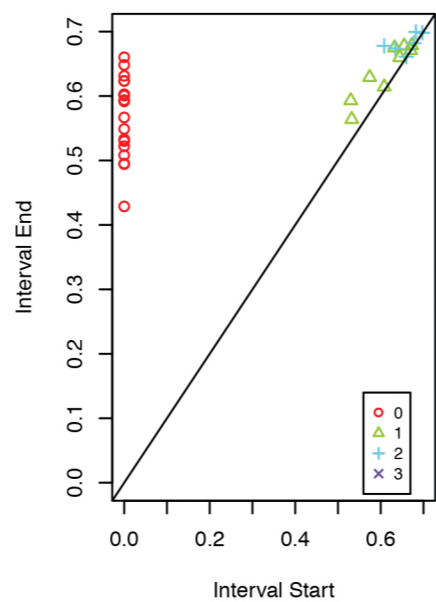**E. RNA-seq Controls**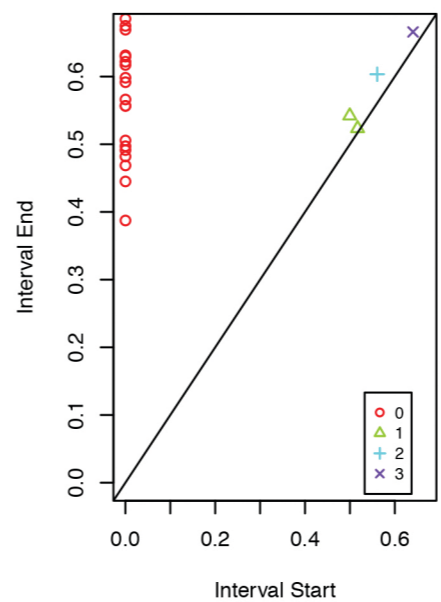**F. SDT**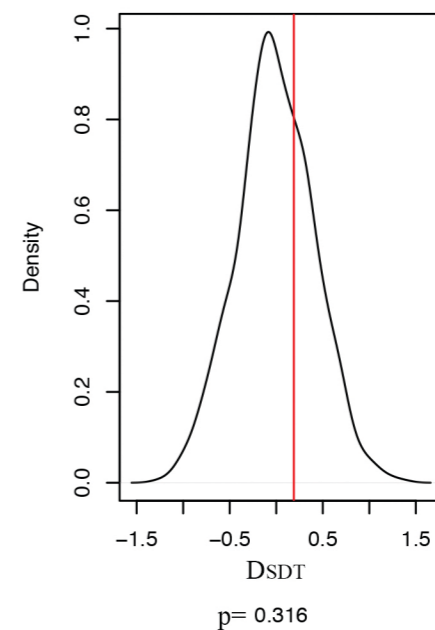**F. Euler Characteristic**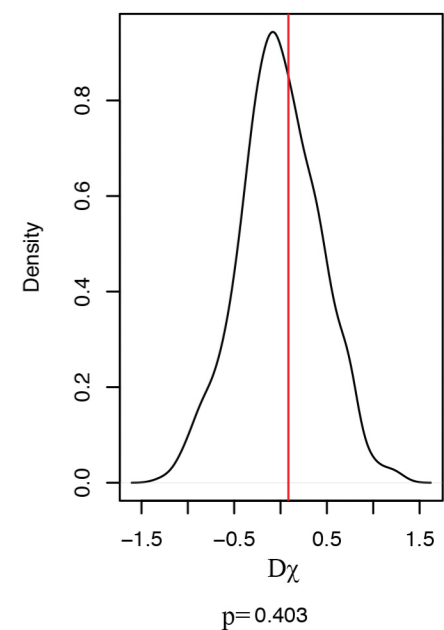

Supplement: rsif20190531supp1.pdf [file rsif20190531supp1.pdf]
